# Supplementary material for: Improved survival of porcine acute liver failure by a bioartificial liver device implanted with induced human functional hepatocytes
Source: PubMed Central journal article supplement (PMC4746613; doi:10.1038/cr.2016.6), 2016-01-15
Supplement: cr20166x1.pdf [file cr20166x1.pdf]

A

|                        | Previous protocol                        | Optimized protocol                                   |
|------------------------|------------------------------------------|------------------------------------------------------|
| Initiating fibroblasts | Immortalized fibroblasts at any passages | Immortalized fibroblasts at defined passages (P8-15) |
| Seeding density        | 1.75-2.0x10 <sup>5</sup> /6cm dish       | 1.5-2.0x10 <sup>5</sup> /6cm dish                    |
| Infection time point   | 24 hrs after seeding                     | Infection during seeding                             |
| MOI                    | 1                                        | 1.25                                                 |
| Medium supplement      | 0.03g/L proline                          | 0.3g/L proline                                       |
| Passage interval       | 4 days                                   | 6 days                                               |
| Replating density      | 1:3 - 1:5                                | 3-5x10 <sup>5</sup> /6cm dish                        |
| Digestion enzyme       | Trypsin                                  | Trypsin and collagenase                              |

B

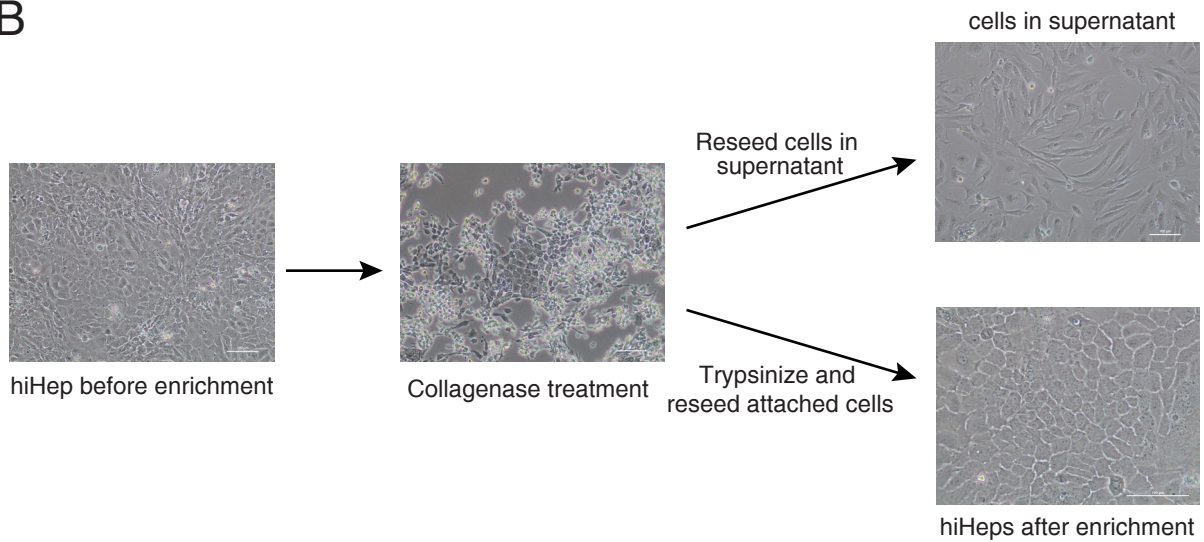

C

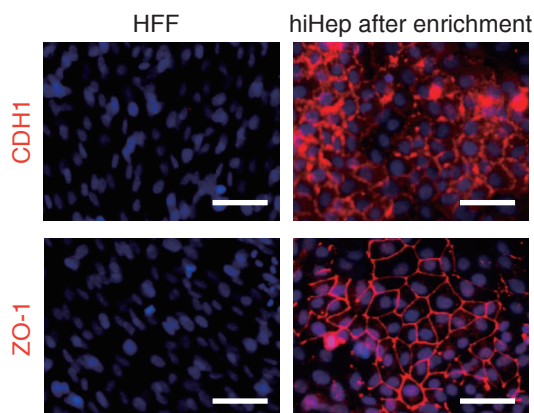

**Figure S1. Optimization of hiHeps**

**A**, Summary of the improvements in the optimized protocol for hiHep induction and culture compared with the previous protocol. The optimized protocol has improvements in fibroblast culture, infection conditions, medium supplement and passage procedures. MOI, Multiplicity of infection. **B**, Strategy of hiHep enrichment by collagenase digestion. Enriched hiHep cells showed homogeneous epithelial morphology. Scale bar, 100  $\mu\text{m}$ . **C**, Tight junction protein of hiHep cells measured by immunofluorescent staining of tight junction protein (ZO-1) and cadherin 1 (CDH1). Scale bar, 50  $\mu\text{m}$ .
