# Supplementary material for: Improved survival of porcine acute liver failure by a bioartificial liver device implanted with induced human functional hepatocytes
Source: PubMed Central journal article supplement (PMC4746613; doi:10.1038/cr.2016.6), 2016-01-15
Supplement: cr20166x2.pdf [file cr20166x2.pdf]

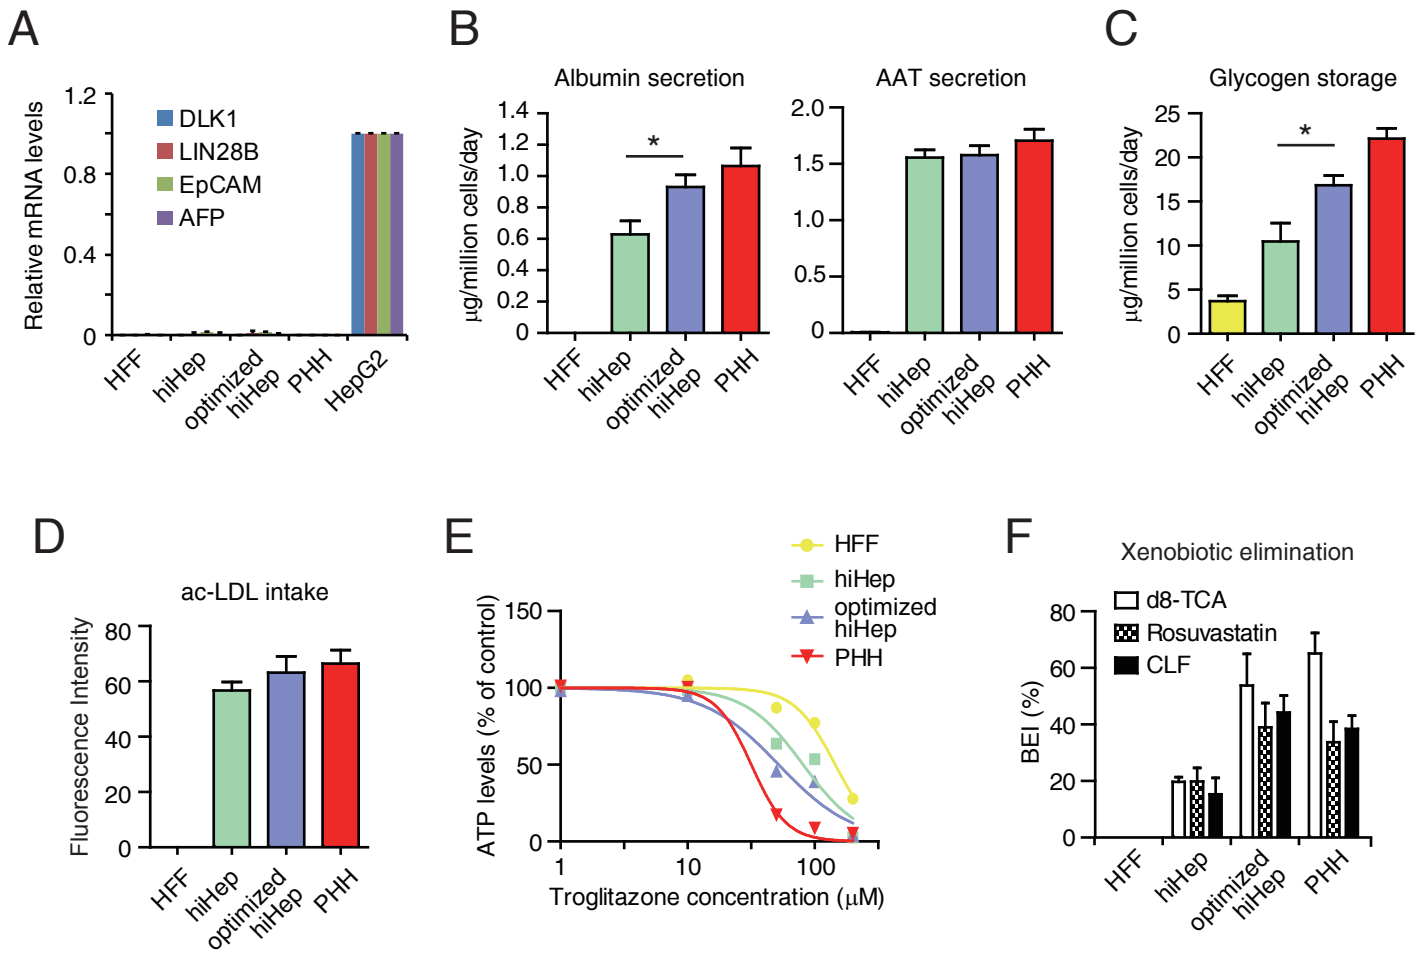

Supplemental Figure 2

**Figure S2. Optimized hiHeps show increased hepatic gene expression and functions**

**A**, Immature marker genes were determined by q-PCR, including delta-like 1 homolog (DLK1), lin-28 homolog B (LIN28B), epithelial cell adhesion molecule (EpCAM),  $\alpha$ -fetoprotein (AFP). **B**, Albumin and AAT secretion of hiHep cells were measured in culture medium by ELISA. **C**, Glycogen storage in optimized hiHep cells were measured quantitatively. **D**, Intake of acetylated low density lipoprotein labeled with the fluorescent probe 1,1'-dioctadecyl-3,3,3',3'-tetramethyl-indocarbocyanine perchlorate (DiI-ac-LDL) in optimized hiHeps was measured by Operetta. **E**, ATP levels of optimized hiHep cells were measured by the CellTiter-Glo assay during exposure to Troglitazone. **F**, Biliary excretion capabilities of hiHep cells were measured by clearance of D8-taurocholic acid (D8-TCA), Rosuvastatin and choly-l-lysyl-fluorescein (CLF). \*,  $P < 0.05$ , *t*-test.
