# Supplementary material for: Improved survival of porcine acute liver failure by a bioartificial liver device implanted with induced human functional hepatocytes
Source: PubMed Central journal article supplement (PMC4746613; doi:10.1038/cr.2016.6), 2016-01-15
Supplement: cr20166x3.pdf [file cr20166x3.pdf]

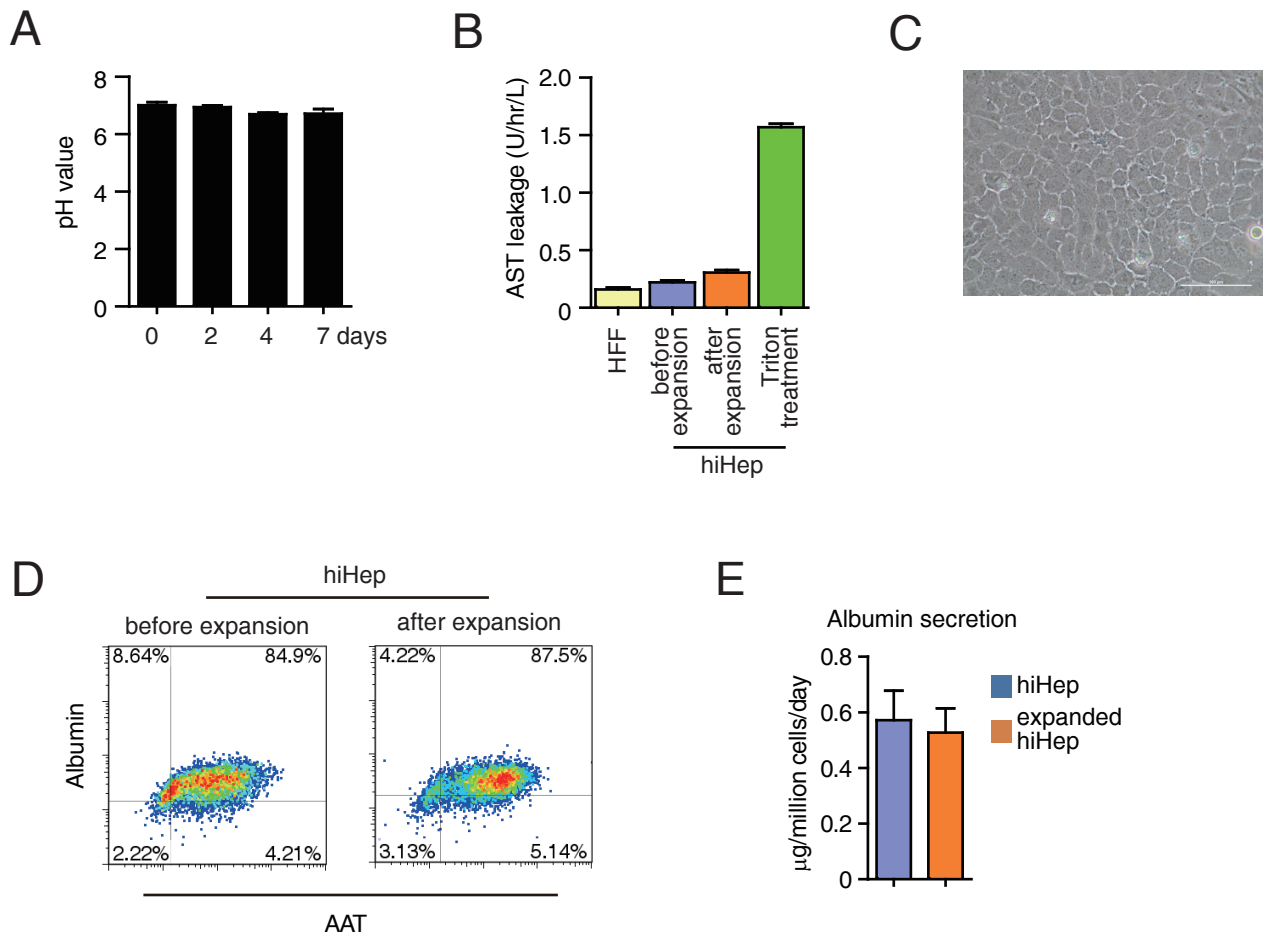

Supplemental Figure 3

**Figure S3. Stability of hiHep cells during the large-scale expansion**

**A**, The pH values of hiHep culture media were measured during the large-scale expansion in Hyperflasks. **B**, Aspartate aminotransferase (AST) leakage from hiHeps were measured before and after expansion. **C**, hiHeps after expansion showed homogeneous epithelial morphology. **D**, hiHeps after expansion displayed high percentage of Albumin and AAT double positive cells as measured by flow cytometry. **E**, Albumin secretion of expanded hiHeps was measured by ELISA.
