# Supplementary material for: Improved survival of porcine acute liver failure by a bioartificial liver device implanted with induced human functional hepatocytes
Source: PubMed Central journal article supplement (PMC4746613; doi:10.1038/cr.2016.6), 2016-01-15
Supplement: cr20166x4.pdf [file cr20166x4.pdf]

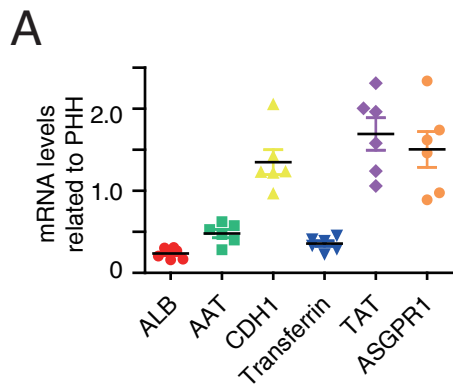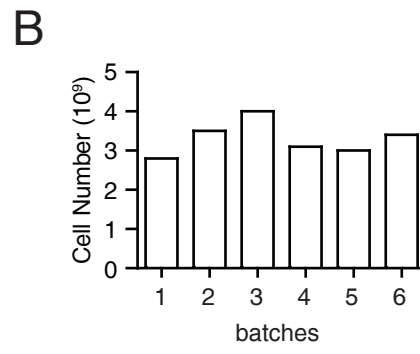

**Figure S4. Consistency of large-scale-expanded hiHeps between different batches**

**A**, Hepatic gene expression levels of large-scale-expanded hiHeps in different batches were measured by q-PCR. Gene expression levels are normalized to those in PHH. **B**, hiHeps cell numbers produced in different large-scale expansion batches.
