# Supplementary material for: Improved survival of porcine acute liver failure by a bioartificial liver device implanted with induced human functional hepatocytes
Source: PubMed Central journal article supplement (PMC4746613; doi:10.1038/cr.2016.6), 2016-01-15
Supplement: cr20166x5.pdf [file cr20166x5.pdf]

A

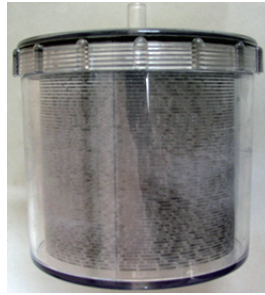

B

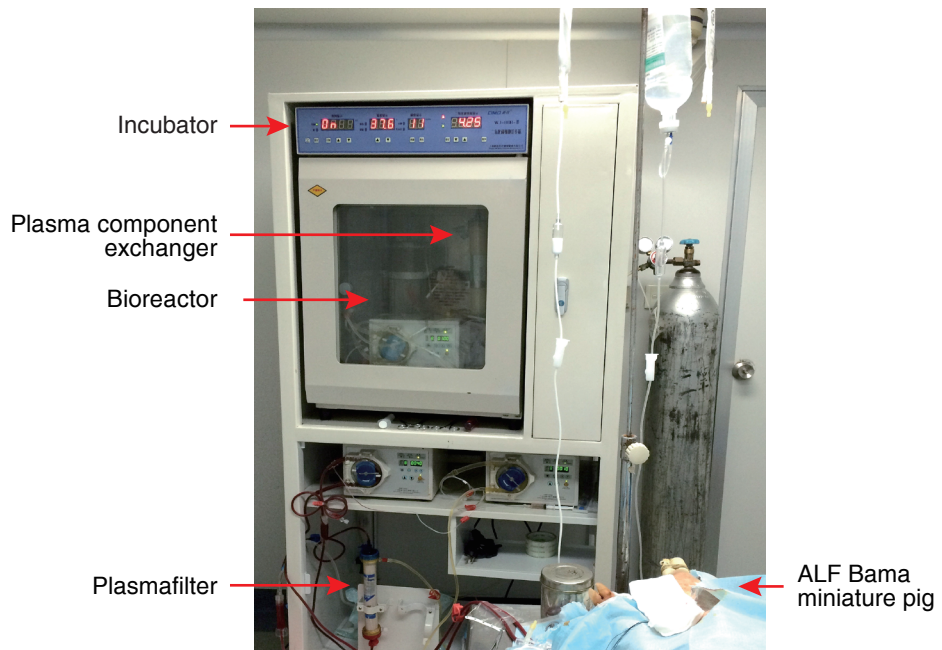

**Figure S5 The BAL support system**

**A**, Photo of a multi-layer bioreactor of the homemade BAL support system. **B**, Photo of an ALF Bama miniature pig receiving the hiHep-BAL support system treatment.
