# Supplementary material for: Improved survival of porcine acute liver failure by a bioartificial liver device implanted with induced human functional hepatocytes
Source: PubMed Central journal article supplement (PMC4746613; doi:10.1038/cr.2016.6), 2016-01-15
Supplement: cr20166x7.pdf [file cr20166x7.pdf]

A

| D-Gal     | Pig weight | Survival time |
|-----------|------------|---------------|
| 0.35 g/kg | 17 kg      | Survived*     |
| 0.35 g/kg | 21 kg      | Survived*     |
| 0.40 g/kg | 18 kg      | 2 days        |
| 0.40 g/kg | 15 kg      | Survived*     |
| 0.45 g/kg | 15 kg      | 2 days        |
| 0.45 g/kg | 23 kg      | 2 days        |
| 0.50 g/kg | 23 kg      | 1 day         |
| 0.50 g/kg | 15 kg      | 2 days        |

B

|              | Before D-gal | D-gal dosage <sup>#</sup> |                 |                |                |
|--------------|--------------|---------------------------|-----------------|----------------|----------------|
|              |              | 0.35 g/kg                 | 0.4 g/kg        | 0.45 g/kg      | 0.5 g/kg       |
| ALT (U/L)    | 60.81±15.24  | 111.85±39.24              | 703.10±421.15   | 185.85±8.56    | 470.90±445.34  |
| AST (U/L)    | 112.45±54.94 | 1000.45±297.62            | 1346.20±483.10  | 1711.00±898.03 | 1377.20±718.14 |
| Ammonia (μM) | 55.38±24.51  | 83.00±1.41                | 97.50±34.65     | 66.00±9.90     | 89.00±2.83     |
| TBIL (μM)    | 0.46±0.41    | 16.25±19.02               | 34.95±9.40      | 20.50±7.35     | 22.00±20.79    |
| ALB (g/L)    | 36.05±3.97   | 32.25±0.21                | 40.35±1.77      | 40.15±0.21     | 36.35±0.35     |
| LDH (U/L)    | 722.75±82.25 | 1325.00±229.10            | 5581.50±4103.34 | 1613.00±380.42 | 1417.50±532.45 |
| PT (s)       | 11.13±0.45   | 27.55±0.64                | 31.40±8.49      | 17.80±3.11     | N.A.           |

C

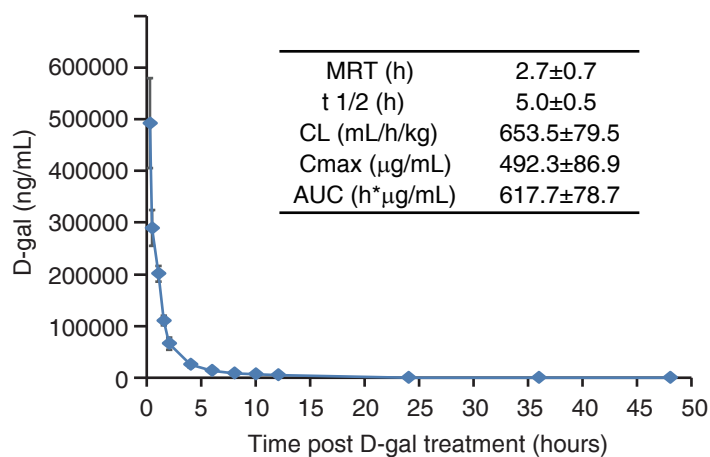

**Figure S7 Establish the D-gal-induced ALF model in Bama miniature pigs**

**A**, Bama miniature pigs at the bodyweight around 15-25 kilogram were used in the experiments. Different doses of D-gal were used in induction of acute liver failure in pigs. Survival time was listed. \*: All survived animals were sacrificed at day 7. **B**, Serum levels of alanine aminotransferase (ALT), aspartate aminotransferase (AST), ammonia, total bilirubin (TBIL), Albumin, lactate dehydrogenase (LDH) and prothrombin time (PT) were measured by automatic biochemistry analyzer. #: All blood biochemical parameters were measure before D-gal treatment and 1 day after D-gal treatment. **C**, D-gal concentrations in the plasma of Bama minipigs (n=3) were measured by LC-MS/MS at 0.25, 0.5, 1, 1.5, 2, 4, 6, 8, 10, 12, 24, 36 and 48 hours after 0.4 g/kg D-gal administration. 1 Bama minipig was found dead around 40 hours, and the other 2 were sacrificed at 48 hours. Mean residence time (MRT), terminal half-life in plasma ( $t_{1/2}$ ), clearance (CL), maximum plasma concentration ( $C_{max}$ ), area under the concentration-time curve over the time interval from 0 extrapolated to last measured time (AUC) were calculated and shown.
