# Supplementary material for: Improved survival of porcine acute liver failure by a bioartificial liver device implanted with induced human functional hepatocytes
Source: PubMed Central journal article supplement (PMC4746613; doi:10.1038/cr.2016.6), 2016-01-15
Supplement: cr20166x8.pdf [file cr20166x8.pdf]

A

| hiHep number        | Pig weight | Survival time* |
|---------------------|------------|----------------|
| 1X10 <sup>9</sup>   | 25 kg      | 2.5 days       |
| 1X10 <sup>9</sup>   | 23 kg      | 2 days         |
| 1.5X10 <sup>9</sup> | 18 kg      | 4 days         |
| 2.6X10 <sup>9</sup> | 23 kg      | Survived       |
| 2.8X10 <sup>9</sup> | 17 kg      | Survived       |

\*: All survived animals were sacrificed at day 7.

B

|              | hiHep number         | Days post D-gal injection |         |         |         |        |        |        |        |
|--------------|----------------------|---------------------------|---------|---------|---------|--------|--------|--------|--------|
|              |                      | Before                    | 1       | 2       | 3       | 4      | 5      | 6      | 7      |
| ALT (U/L)    | 1X10 <sup>9</sup>    | 41.3                      | 135.6   | 765.9   | 743     |        |        |        |        |
|              | 1.5X10 <sup>9</sup>  | 54.6                      | 318.2   | 731.5   | 604.4   |        |        |        |        |
|              | ~3.0X10 <sup>9</sup> | 55.65                     | 145.75  | 906.25  | 656.25  | 478.95 | 370.8  | 284.05 | 229.15 |
| AST (U/L)    | 1X10 <sup>9</sup>    | 28.2                      | 1761.25 | 1222.9  | 3316.4  |        |        |        |        |
|              | 1.5X10 <sup>9</sup>  | 24.8                      | 2992    | 4772.5  | 1682.8  |        |        |        |        |
|              | ~3.0X10 <sup>9</sup> | 19.9                      | 497.85  | 3140.75 | 1617.85 | 584.05 | 332.05 | 205.95 | 143.3  |
| Ammonia (μM) | 1X10 <sup>9</sup>    | 14.5                      | 81.5    | 119     | 300     |        |        |        |        |
|              | 1.5X10 <sup>9</sup>  | 67                        | 153     | 500     | 493     |        |        |        |        |
|              | ~3.0X10 <sup>9</sup> | 65                        | 150.5   | 163.5   | 89      | 419.5  | 223.5  | 57     | 45     |
| TBIL (μM)    | 1X10 <sup>9</sup>    | 0.35                      | 23.2    | 56.4    | 72.3    |        |        |        |        |
|              | 1.5X10 <sup>9</sup>  | 0.4                       | 20.7    | 59.1    | 93.7    |        |        |        |        |
|              | ~3.0X10 <sup>9</sup> | 0.6                       | 22.35   | 53.8    | 45      | 46.35  | 29.6   | 8.6    | 2.6    |
| TBA (μM)     | 1X10 <sup>9</sup>    | 24.65                     | 342.1   | 379.2   | 384     |        |        |        |        |
|              | 1.5X10 <sup>9</sup>  | 13.3                      | 310.7   | 332.6   | 347.2   |        |        |        |        |
|              | ~3.0X10 <sup>9</sup> | 16.45                     | 359.6   | 358.95  | 305.1   | 215.15 | 197.6  | 128.05 | 45.55  |
| ALB (g/L)    | 1X10 <sup>9</sup>    | 33.9                      | 28.8    | 30.2    | 30.7    |        |        |        |        |
|              | 1.5X10 <sup>9</sup>  | 35.6                      | 28.3    | 32.7    | 32.5    |        |        |        |        |
|              | ~3.0X10 <sup>9</sup> | 40.5                      | 34.95   | 31.85   | 31.75   | 32.75  | 31.7   | 32.75  | 32.95  |
| LDH (U/L)    | 1X10 <sup>9</sup>    | 556.5                     | 1167.5  | 3841    | 2912    |        |        |        |        |
|              | 1.5X10 <sup>9</sup>  | 657                       | 2466    | 8655    | 4938    |        |        |        |        |
|              | ~3.0X10 <sup>9</sup> | 490.5                     | 821.5   | 2940.5  | 3437    | 2285.5 | 1782   | 1586.5 | 1451.5 |

**Figure S8 Determine the cell number of hiHeps for hiHep-BAL**

**A**, ALF was induced in Bama miniature pigs by D-gal at 0.35 g/kg. Different numbers of hiHeps were implanted to hiHep-BAL to treat the ALF pigs. Survival time was listed. \*: All survived animals were sacrificed at day 7. **B**, Serum levels of alanine aminotransferase (ALT), aspartate aminotransferase (AST), ammonia, total bilirubin (TBIL), total bile acids (TBA), Albumin and lactate dehydrogenase (LDH) were measured by automatic biochemistry analyzer. Data are shown as the mean.
